# Supplementary material
Source: PubMed Central journal article supplement (PMC7592116)
Supplement: ci0c00695_si_005.pdf [file ci0c00695_si_005.pdf]

# Supporting Information

## Annotation of Allosteric Compounds to Enhance Bioactivity Modeling for Class A GPCRs

*Lindsey Burggraaff<sup>1</sup>, Amber van Veen<sup>1</sup>, Chi Chung Lam<sup>1</sup>, Herman W.T. van Vlijmen<sup>1,2</sup>,  
Adriaan P. IJzerman<sup>1</sup>, and Gerard J.P. van Westen<sup>1\*</sup>*

<sup>1</sup> Division of Drug Discovery & Safety, Leiden Academic Centre for Drug Research, Leiden University, Einsteinweg 55, 2333 CC, Leiden, The Netherlands

<sup>2</sup> Janssen Research & Development, Turnhoutseweg 30, 2340 Beerse, Belgium

### Corresponding Author

\*E-mail: [gerard@lacdr.leidenuniv.nl](mailto:gerard@lacdr.leidenuniv.nl) (G.J.P. van Westen)

Figure S1: Physicochemical properties of orthosteric and allosteric compounds in ChEMBL per protein family (png)

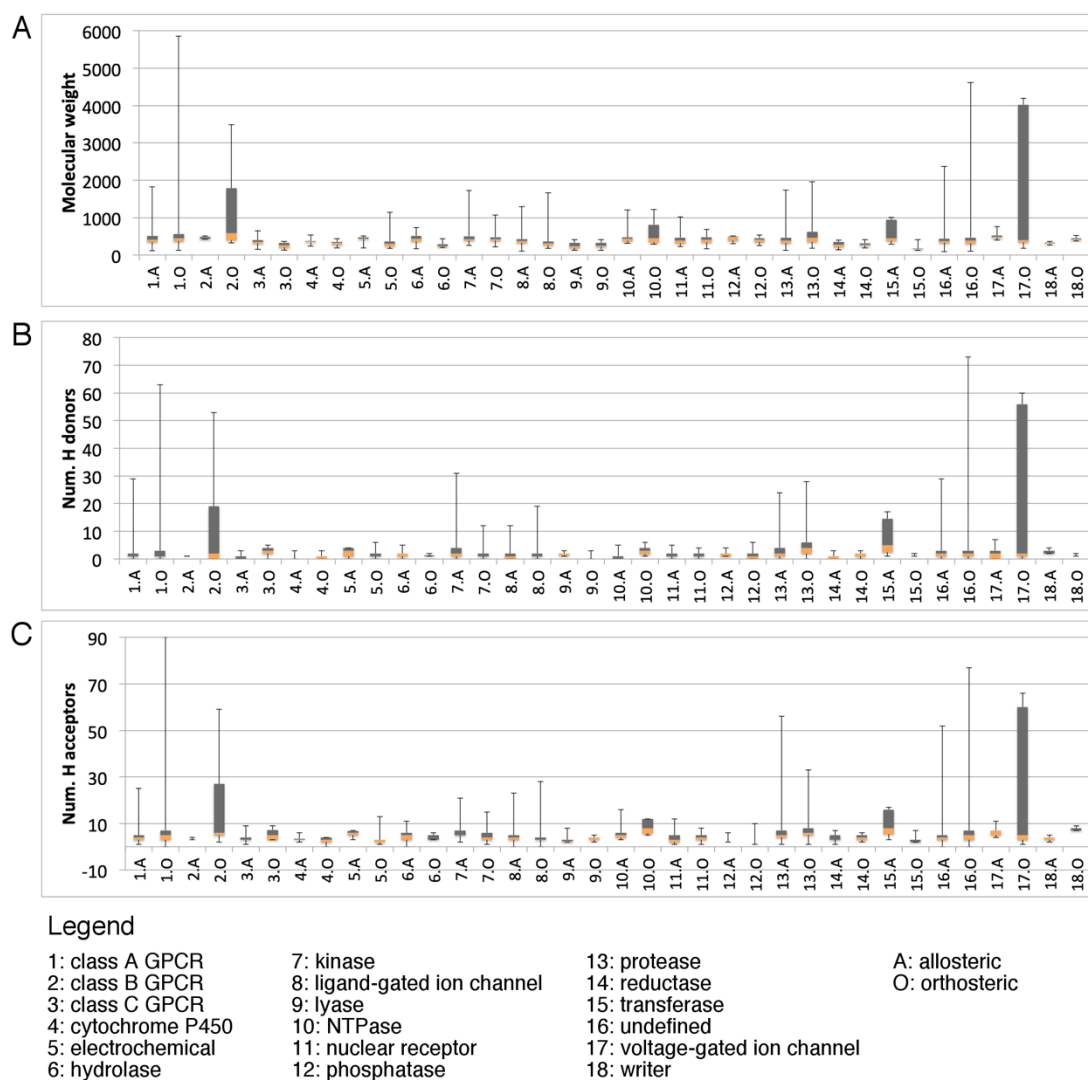

Table S2: Performance of bioactivity models for orthosteric compounds (xlsx)

Table S3: Keywords used in text mining (xlsx)

Protocol S4: Pipeline Pilot protocol for text mining (ppxml)

Dataset S5: Compound dataset, including binding type annotation (tsv)

Available at DOI: <http://dx.doi.org/10.4121/uuid:de9e9805-916f-47e5-8e72-323f675d5d5a>

Data S6: Compound descriptors (tsv)

Available at DOI: <http://dx.doi.org/10.4121/uuid:5738caea-2390-4dc7-9830-8d9644232144>

Script S7: Python script to run Convolutional Deep Neural Networks and Random Forest models (py)
